# Supplementary material
Source: publisher figshare collection journal article supplement (https://frontiersin.figshare.com/ndownloader/files/25429898)
Supplement: Supplementary file 1 [file 25429898]

## Sheet: Table S1
Table S1. Trace element compositions of clinopyroxene of sample IODP Hole 1473A, 84R4_118-122
Area		Area A					Area B				Area D*																			Area G
Location (μm)		90.9091	250	363.636	454.545						5	105.244	212.59	312.548	389.072	512.509	600.434	712.56	807.37	912.475	1023.21	1107.4	1204.17	1512.5	1612.53	1710.74	1805.57			103.896	220.779	363.636	467.532	584.416	753.247	857.143	961.039	1038.96	1103.9	1181.82	1272.73	1350.65	1415.58	1506.49	1571.43
Mg/(Mg+Fe) (mol%)		75.4	77.5	78.4	79.5		77.4	79.1	81.3																					77.7269	77.6769	75.5171	79.7816	80.8253	81.954	83.0041	84.1276	84.1464	84.7562	84.9985	85.7485	85.7847	86.0022	86.0233	85.8486
(ppm)
Sc		117.7	143.64	143.91	142.52		135.66	111.33	106.24		99.2406	98.467	100.087	102.637	105.127	106.366	106.947	108.659	108.416	109.197	107.627	103.255	107.14	107.145	105.535	109.749	104.854			104.08	107.58	107.01	98.66	93.67	89.41	90	92.59	91.24	92.42	93.19	91.78	93.46	93.46	93.29	94.52
Ti		6691.42	7237.53	6500.83	6500.74		4923.03	4615.07	3778.26		5173.7	3431.02	3078.42	3105.56	3263.96	3204.46	3281.93	3289.44	3504.1	3433.98	3247.97	3412.5	4217.88	3850.9	3239.85	3473.95	3125.23			5615	5706.61	5048.53	3965.45	2951.08	2729.99	2731.49	2795.19	2773.82	2746.36	2804.93	2783.77	2803.23	2886.81	2869.27	2912.05
V		589.23	661.94	618.66	624.81		477.49	447.87	413.23		404.512	351.964	350.652	361.57	369.134	374.711	380.82	375.273	381.771	375.797	368.091	357.037	383.989	377.81	364.973	386.562	367.821			549.7	565.09	515.65	422.42	371.67	371.66	371.78	372.35	376.86	381.85	384.85	381.96	388.41	391.02	393.81	398.03
Cr		660.45	739.14	773.12	764.15		1502.02	1044.84	1634.45		1305.78	2107.48	3176.24	3509.23	3775.91	3729.79	3784.11	4249.12	4474.3	4110.75	3492.15	4077.78	4473.32	5175.63	5601.74	5357.19	3966.11			960.33	956.07	1422.29	2964.12	3720.08	3791.41	3849.44	3955.44	3789.05	3647.54	3534.84	3294.11	3164.45	3168.17	3175.41	3174.92
Co		45.09	56.78	56.47	57.4		47.47	42.13	43.22		38.8814	39.6132	36.1199	37.2704	38.8752	38.0727	40.4538	39.474	42.0718	40.8923	41.5277	40.3623	41.326	38.9207	38.2109	39.4694	40.188			47.19	49.82	48.11	44.85	42.05	40.58	40.28	39.88	40.11	39.52	39.32	41.08	41.5	40.33	41.62	40.93
Ni		116.85	138.49	134.19	136.49		124.77	110.45	110.98		114.031	124.319	118.825	122.773	126.54	137.81	144.785	144.572	151.841	147.713	144.508	140.137	147.006	144.177	146.136	150.626	157.314			113.68	124.62	125.37	117.5	116.83	114.51	130.32	133.78	142.27	148.87	153.82	160.12	165.44	168.51	168.14	173.13
Rb		<0.01	0.0892	0.105	0.0429		<0.01	0.11	0.14		<0.01	<0.01	<0.01	<0.01	<0.01	<0.01	<0.01	<0.01	<0.01	<0.01	<0.01	<0.01	<0.01	<0.01	<0.01	<0.01	<0.01			<0.01	0.172	0.189	0.139	0.0239	0.11	0.299	0.116	0.096	0.056	0.029	0.102	<0.01	0.03	0.082	0.059
Sr		16.53	14.26	17.37	15.08		12.82	11.5	11.64		10.2441	10.0306	12.6012	13.1112	12.6718	13.4621	14.279	13.9992	13.081	11.2956	13.8247	12.7193	12.4911	97.7505	18.3874	16.0036	13.8996			10.5	11.21	11.62	12.38	12.63	13.41	13.87	13.47	13.71	13.39	13.86	13.4	13.83	14.36	13.67	13.65
Y		37.44	39.52	34.95	33.43		31.28	30.26	23.72		23.9323	18.5413	15.8482	15.0521	15.3948	15.1509	15.6222	15.2606	15.6159	13.6109	15.657	15.0758	21.012	13.683	13.1765	14.3949	13.3567			26.24	25.41	23.86	20.34	14.73	12.42	12.09	12.17	11.94	12.12	11.91	12.45	12.54	12.73	12.84	13.08
Zr		54.25	42.88	27	26.51		31.4	33.74	19.84		41.522	22.2033	14.8392	12.7091	12.5979	13.0112	13.5479	13.5494	13.8863	13.3512	13.9011	15.1011	20.8002	17.4072	10.9182	12.1944	10.9558			32.41	30.25	26.49	19.32	10.7	9.33	9.4	9.38	9.09	8.94	9.11	9.34	9.47	9.56	9.27	9.46
Nb		0.0201	0.0484	0.0438	0.0337		0.07	0.04	0.06		0.078574	0.08841	0.158403	0.296531	0.105605	0.121969	0.123633	0.124313	0.119594	0.0933501	0.0898002	0.0920732	0.115597	0.100098	0.0757601	0.0757854	0.0623203			<0.01	0.045	0.0226	0.0259	0.0441	0.0268	0.0256	<0.01	<0.01	<0.01	0.0169	0.0223	0.0262	<0.01	<0.01	<0.01
Ba		0.251	0.302	0.469	0.131		0.04	0.42	0.6		-0.00263423	0.0346454	0.0133476	0.00271415	0.010628	0.0214302	0.0328455	0.0486304	0.235444	0.171443	0.0319182	0.0382964	0.0680638	0.71807	0.153112	0.174153	0.0805624			0.095	1.696	1.016	0.445	0.239	0.515	1.577	0.694	0.532	0.2	0.321	0.37	0.365	0.274	0.227	0.408
La		0.558	0.801	0.653	0.517		0.67	0.65	0.56		0.463879	0.416777	0.326497	0.248286	0.244844	0.292483	0.287259	0.266626	0.259317	0.266982	0.274148	0.343669	0.399431	0.364094	0.232217	0.247212	0.205381			0.438	0.533	0.541	0.457	0.302	0.295	0.272	0.204	0.182	0.208	0.233	0.2	0.21	0.185	0.251	0.219
Ce		3.4	3.88	3.04	3.05		3.24	3.07	2.47		2.76227	2.07942	1.65246	1.25063	1.2527	1.42343	1.44394	1.34429	1.19257	1.33384	1.41779	1.6388	1.7879	1.69744	1.10479	1.15917	1.08396			3.38	3.36	3.04	2.518	1.869	1.325	1.16	1.117	1.004	1.13	1.245	1.327	1.171	1.187	1.221	1.293
Pr		0.92	0.912	0.777	0.786		0.81	0.76	0.53		0.652054	0.434551	0.346981	0.314752	0.332952	0.330966	0.335867	0.290867	0.299295	0.290207	0.313757	0.359728	0.407442	0.360767	0.254229	0.300121	0.258141			0.761	0.816	0.759	0.536	0.421	0.351	0.262	0.346	0.308	0.368	0.258	0.276	0.275	0.275	0.305	0.336
Nd		6.92	7.23	6.27	5.98		5.24	6	4.34		4.43611	3.31204	2.25781	2.22931	2.25276	2.16914	2.3761	2.16707	2.42511	2.17412	2.25784	2.48206	3.07481	2.62238	1.95266	2.285	2.22911			5.42	5.4	4.87	4.12	2.92	2.31	1.97	2.37	2.6	2.41	2.73	2.38	2.28	2.41	2.49	2.33
Sm		3.3	3.48	3.09	3.13		2.41	2.42	2.11		2.12115	1.54464	1.24081	1.31545	1.24084	1.31906	1.35859	1.22357	1.20751	1.3498	1.32368	1.33397	1.4574	1.41111	1.19657	1.19326	1.20437			2.59	2.57	2.21	1.85	1.45	1.07	1.34	1.27	1.38	1.029	0.989	1.191	1.126	1.063	1.47	1.46
Eu		0.886	1.147	1.05	1.028		0.92	0.75	0.59		0.632379	0.478678	0.457371	0.527057	0.524203	0.540358	0.52118	0.511718	0.441301	0.481011	0.524562	0.497363	0.504045	0.548419	0.4469	0.476162	0.433176			0.96	0.745	0.754	0.682	0.613	0.41	0.546	0.516	0.601	0.538	0.447	0.483	0.428	0.514	0.594	0.482
Gd		4.9	5.51	4.63	4.41		3.96	3.86	3.08		3.40301	2.46053	1.98213	2.18522	2.12246	2.19785	2.25331	2.263	2.17744	2.02064	2.01262	2.16662	2.48105	2.13895	1.95699	2.29831	1.95132			3.58	3.16	3.4	2.36	2	1.6	1.6	2	1.83	1.75	1.83	1.9	1.53	1.57	1.99	2.06
Tb		0.97	1.054	0.972	1.01		0.82	0.72	0.6		0.597407	0.476106	0.347098	0.381494	0.392029	0.373479	0.371137	0.382992	0.376964	0.399494	0.391091	0.379904	0.458155	0.404165	0.372958	0.404106	0.376017			0.713	0.722	0.617	0.563	0.362	0.325	0.361	0.357	0.336	0.332	0.396	0.333	0.371	0.334	0.353	0.345
Dy		6.35	7.28	6.38	6.27		5.54	5.63	4.63		4.18517	3.24786	2.78518	2.76539	2.69919	2.86823	2.87876	2.88189	2.64873	2.90146	2.65721	2.70719	2.91933	3.13478	2.49339	2.79857	2.6859			4.44	4.66	4.39	3.55	2.82	1.98	2.55	2.26	2.34	2.38	2.26	2.51	2.16	2.5	2.79	2.62
Ho		1.306	1.554	1.388	1.362		1.25	1.11	0.89		0.936812	0.680967	0.587755	0.596271	0.56168	0.631111	0.616105	0.623482	0.576459	0.580589	0.630204	0.585922	0.612987	0.61491	0.54237	0.587853	0.547248			0.943	1.136	0.933	0.783	0.619	0.563	0.493	0.442	0.511	0.505	0.44	0.47	0.558	0.622	0.407	0.54
Er		3.63	4.22	4.04	3.73		3.33	3.12	2.99		2.62575	2.0581	1.59057	1.64309	1.63177	1.57809	1.6901	1.74856	1.58668	1.55172	1.67691	1.72821	1.8556	1.65516	1.50037	1.76682	1.58924			2.29	2.93	2.55	2.29	1.575	1.382	1.139	1.335	1.209	1.227	1.384	1.319	1.574	1.296	1.479	1.416
Tm		0.564	0.599	0.518	0.443		0.47	0.52	0.35		0.368646	0.278219	0.229012	0.206883	0.217802	0.221559	0.224812	0.222778	0.232547	0.254775	0.231568	0.251154	0.24493	0.255241	0.22312	0.236736	0.218662			0.386	0.371	0.329	0.276	0.152	0.213	0.232	0.187	0.153	0.195	0.187	0.178	0.137	0.172	0.235	0.161
Yb		2.78	3.66	3.55	3.32		2.96	3.08	3.06		2.496	1.87939	1.46345	1.4239	1.39396	1.49231	1.51711	1.50968	1.47807	1.56843	1.50412	1.52312	1.60628	1.63771	1.36343	1.46677	1.51942			2.58	2.9	2.6	2.01	1.66	1.082	1.213	1.203	1.32	1.5	1.219	1.33	1.36	1.25	1.2	1.225
Lu		0.62	0.53	0.531	0.485		0.44	0.41	0.31		0.347576	0.273035	0.203132	0.205597	0.217745	0.21847	0.222563	0.213601	0.193579	0.230314	0.208772	0.223385	0.235987	0.226886	0.208584	0.212732	0.197657			0.428	0.368	0.394	0.253	0.19	0.192	0.19	0.123	0.205	0.171	0.158	0.155	0.179	0.185	0.149	0.203
Hf		2.29	1.588	1.199	1.168		1.15	1.09	0.61		1.06722	0.52374	0.527033	0.609241	0.709134	0.689952	0.624816	0.67813	0.796015	0.707156	0.616715	0.564948	0.935532	0.739605	0.645855	0.764275	0.562207			1.07	1.244	0.82	0.602	0.421	0.462	0.338	0.419	0.397	0.499	0.449	0.482	0.47	0.544	0.566	0.399
Ta		<0.01	0.0138	0.0111	<0.01		<0.01	0.02	0.01		0.0131075	0.0114133	0.00554912	<0.01	<0.01	<0.01	0.00651399	<0.01	<0.01	<0.01	<0.01	0.00659021	0.00805478	0.0068531	<0.01	<0.01	<0.01			<0.01	<0.01	0.0232	0.0223	0.0067	<0.01	0.019	<0.01	<0.01	0.0032	<0.01	<0.01	<0.01	<0.01	<0.01	<0.01
Pb		0.088	0.131	0.057	0.055		0.03	0.1	0.16		0.043945	0.1011	0.0744823	0.0060516	0.00680359	0.0103126	0.0193144	0.0138523	0.0150885	0.0549956	0.0110851	0.0106328	0.0151021	0.0144915	0.0126902	0.0122082	0.0146369			0.047	0.232	0.246	0.052	0.115	0.118	0.185	0.089	0.105	0.054	0.103	0.049	0.118	<0.01	0.049	0.091
Th		<0.01	0.0293	0.0148	0.0174		<0.01	0.01	0.01		0.00962352	0.0147383	0.00783833	0.0115342	0.00733459	0.009064	0.0117035	0.00818079	0.00715019	0.00500769	0.00520898	0.00704679	0.00628943	0.00520178	<0.01	<0.01	<0.01			<0.01	0.0156	0.0328	<0.01	0.0139	<0.01	<0.01	0.0044	<0.01	<0.01	<0.01	<0.01	<0.01	<0.01	<0.01	<0.01
U		<0.01	<0.01	<0.01	0.0139		<0.01	<0.01	<0.01		<0.01	<0.01	0.00677825	0.00685653	0.00577754	<0.01	<0.01	0.00662372	<0.01	<0.01	<0.01	<0.01	<0.01	<0.01	<0.01	<0.01	<0.01			<0.01	<0.01	0.0283	<0.01	<0.01	<0.01	<0.01	0.0233	0.0274	<0.01	<0.01	0.0135	<0.01	0.0135	<0.01	<0.01
Eu/Eu*		0.669097	0.795441	0.843004	0.840256		0.904361	0.745195	0.702822		0.714775	0.745634	0.885645	0.944024	0.980916	0.963741	0.904572	0.933864	0.826468	0.884477	0.975963	0.888419	0.804956	0.95861	0.886866	0.873157	0.858085			0.957392	0.793883	0.835306	0.99118	1.09313	0.951573	1.13238	0.983202	1.14847	1.21749	1.00901	0.975045	0.990236	1.20825	1.05466	0.844009
Ti/Ti*		0.60092	0.572442	0.599171	0.619288		0.525834	0.495922	0.501198		0.745323	1.01123	1.07636	0.808071	0.617629	0.544676	0.537242	0.548294	0.578588	0.568183	0.60759	0.575792	0.521774	0.563349	0	0.566454	1.11242			0.705504	0.744946	0.6546	0.686286	0.622479	0.768336	0.677411	0.658605	0.671472	0.674113	0.690916	0.638561	0.772448	0.72993	0.609994	0.62791
Sr/Sr*		0.228233	0.180315	0.266457	0.236482		0.208376	0.179453	0.238099		0.195991	0.255979	0.436918	0.525886	0.505191	0.513097	0.516285	0.549312	0.515144	0.444234	0.517488	0.422367	0.356793	3.10293	0.838425	0.658564	0.598863			0.164297	0.176253	0.202256	0.25742	0.36208	0.513348	0.614486	0.554452	0.568305	0.543413	0.503494	0.504985	0.566857	0.568614	0.525059	0.526687
Zr/Nd (N)		0.900161	0.680993	0.49445	0.50902		0.688058	0.645684	0.524902		1.07474	0.769746	0.754658	0.65459	0.642108	0.68874	0.654686	0.717916	0.657478	0.705119	0.706942	0.698591	0.776741	0.762186	0.642022	0.612776	0.564335			0.686604	0.643218	0.624567	0.538439	0.420753	0.463763	0.547883	0.454445	0.401437	0.425938	0.383162	0.450605	0.476916	0.455478	0.427471	0.466189
Ce/Y (N)		0.234859	0.253909	0.224952	0.235954		0.267881	0.262381	0.269306		0.2985	0.290044	0.269658	0.214881	0.210445	0.242974	0.239041	0.227816	0.197506	0.253443	0.234189	0.281132	0.220059	0.320831	0.216842	0.208258	0.209882			0.333132	0.341978	0.329508	0.320161	0.328148	0.275904	0.248139	0.23737	0.217467	0.241123	0.270347	0.275654	0.241503	0.241149	0.245931	0.255655
Eu/Eu*=EuN/√(GdN*SmN); Sr/Sr*=SrN/√(CeN*NdN); Ti/Ti*=TiN/√(GdN*DyN); normalised to C1 chondrite (Anders and Ebihara, 1982)
Table S1. (continued)
Grain		Area I														Area X					Area Y				Average Cpx 1			Average Cpx 2
Location (μm)		109	218	327	436	545	654	763	872	981	1090	1308	1417	1526
Mg/(Mg+Fe) (mol%)		81.4026	81.0084	80.7018	81.5566	81.7724	81.9252	82.7041	84.5304	84.5064	84.6229	84.4012	84.3954	85.2983		78.3	77.5	78.2	77.9		77.6	77.4	76.7		85.0127			79.5219
(ppm)
Sc		109.18	107.31	105.16	98.58	95.88	93.33	94.63	92.52	88.16	90.52	92.77	93.61	91.15		114.08	111.81	112.14	113.97		113.69	114.93	118.62		92.312			109.83
Ti		6351.78	5899.08	5820.54	4245.14	3514.3	3523.73	3430.72	2898.37	2587.72	2585.3	2746.74	2909.05	2604.39		5783.61	5429.45	5563.09	5560.22		6008.91	5711.59	6262.37		2780.47			4941.74
V		503.12	505.09	498.8	435.78	393.37	364.13	384.56	345.68	338.27	332.47	337.77	340.2	331.69		561.92	538.82	549.12	536.36		549.69	553.93	569.03		366.348			489.8
Cr		1313.87	1225.55	1265.39	1324.13	1841.77	3150.91	1754.01	2723.04	2194.41	2279.28	2688.97	3823.09	2865.22		704.08	742.07	663.27	669.74		739.17	703.82	727.23		3165.2			1604.64
Co		37.44	39.76	40.6	41.99	40.14	36.96	39.35	36.33	36.59	36.34	36.72	35.49	37.72		49.28	48.77	46.72	46.21		48.01	50.44	47.17		38.8987			45.0207
Ni		106.82	107.84	119.26	120.05	119.47	117.91	123.43	126.02	121.96	130.97	130.64	136.79	141.33		123.21	125.57	120.18	122.68		122.77	124.43	112.62		146.786			120.472
Rb		0.02	0.02	0.14	0.25	0.07	0.05	0.1	0.02	0.04	0.06	0.04	0.03	0.06		0.15	0.06	0.02	0.02		0.03	0.06	0.02		0.0585714			0.0972
Sr		11.08	12.11	11.87	12.32	12.29	11.2	13.29	12.35	13.72	13.46	14.07	13.06	12.49		12.44	12.1	12.62	12.97		12.31	12.04	12.05		13.4993			12.6943
Y		31.45	30.99	29.01	24.36	19.96	18.36	18.12	15.99	14.01	13.23	13.55	13.88	13.98		33.77	30.42	32.38	33.28		35.03	34.85	36.75		13.0947			27.1047
Zr		43.85	33.71	31.33	21.49	16.17	19.75	15.12	15.46	10.86	11.3	13.03	11.86	10.24		34.42	29.21	31.63	31.74		33.44	34.51	44.65		10.4247			27.568
Nb		0.03	0.05	0.06	0.07	0.06	0.07	0.02	0.03	0.03	0.02	0.03	0.02	<0.01		0.06	0.04	0.05	0.06		0.06	0.04	0.05		0.024425			0.0481379
Ba		0.06	0.3	0.64	0.93	0.2	0.1	0.23	0.21	0.17	0.28	0.18	0.2	0.23		0.58	0.33	0.26	0.12		0.08	0.14	0.11		0.310733			0.402533
La		0.59	0.49	0.59	0.43	0.38	0.42	0.4	0.45	0.29	0.25	0.3	0.32	0.2		0.59	0.55	0.64	0.6		0.55	0.55	0.73		0.2468			0.5259
Ce		3.41	3.05	2.96	2.41	1.96	2.11	1.57	1.81	1.37	1.3	1.34	1.41	1.14		3.44	3.31	3.41	3.28		3.07	3.25	3.79		1.271			2.81507
Pr		0.86	0.75	0.76	0.61	0.48	0.52	0.42	0.46	0.31	0.31	0.3	0.32	0.31		0.97	0.75	0.79	0.79		0.74	0.84	0.97		0.317133			0.687367
Nd		6.34	5.46	5.35	4.72	3.91	3.61	3.61	3.24	2.16	1.87	2.61	2.5	2.41		6.1	5.38	5.9	6.17		5.86	5.95	6.75		2.45267			5.045
Sm		2.96	2.82	2.83	2.27	1.81	1.91	1.62	1.06	1.36	1.32	1.36	1.15	1.06		3.14	2.94	3	2.75		2.92	2.86	3.07		1.2192			2.411
Eu		0.84	0.88	0.89	0.78	0.6	0.58	0.61	0.57	0.5	0.41	0.44	0.54	0.56		0.92	1	1.12	1.05		1.04	0.9	1.11		0.5082			0.815033
Gd		4.23	4.18	4.39	3.07	2.29	2.76	2.29	1.69	1.65	1.76	1.87	1.93	1.45		4.58	3.78	4.01	4.27		4.92	4.79	5.12		1.78733			3.617
Tb		0.85	0.76	0.87	0.63	0.46	0.49	0.45	0.39	0.37	0.4	0.39	0.44	0.47		0.95	0.83	0.82	0.79		0.92	0.93	0.87		0.374467			0.7123
Dy		5.62	4.59	5.8	4.68	3.32	3.34	3.32	2.7	2.33	2.78	2.65	2.79	2.47		6.09	5.34	5.79	6.07		6.3	6.09	6.87		2.50267			4.88167
Ho		1.24	1.16	1.2	0.94	0.75	0.78	0.68	0.63	0.52	0.5	0.57	0.56	0.59		1.24	1.2	1.25	1.26		1.35	1.31	1.45		0.524333			1.054
Er		3.34	3.11	3.22	2.43	2.23	2.14	1.77	1.9	1.36	1.4	1.44	1.58	1.6		3.44	3.46	3.63	3.33		3.83	3.64	3.63		1.4346			2.8722
Tm		0.56	0.47	0.46	0.35	0.34	0.3	0.25	0.24	0.21	0.16	0.19	0.17	0.21		0.54	0.47	0.48	0.5		0.53	0.52	0.54		0.185667			0.412433
Yb		2.89	3.12	2.69	2.4	2.38	1.61	1.69	1.43	1.17	1	1.38	1.4	1.21		3.84	2.88	3.17	3.56		3.66	3.34	3.76		1.2798			2.72117
Lu		0.42	0.43	0.47	0.38	0.33	0.22	0.25	0.26	0.16	0.18	0.16	0.22	0.19		0.51	0.44	0.5	0.48		0.53	0.49	0.47		0.179867			0.3947
Hf		1.73	1.56	1.21	0.85	0.75	0.76	0.69	0.59	0.36	0.49	0.44	0.44	0.49		1.48	1.06	1.27	0.98		1.41	1.04	1.84		0.469			1.04673
Ta		0.02	0.01	<0.01	<0.01	<0.01	0.01	0.01	<0.01	<0.01	<0.01	0.01	0.01	<0.01		0.01	<0.01	0.01	<0.01		<0.01	<0.01	0.01		0.00773333			0.0141313
Pb		0.05	0.04	0.16	0.15	0.03	0.07	0.05	0.08	0.1	0.44	0.04	0.07	0.1		0.11	0.05	0.1	0.05		0.06	0.08	0.03		0.106286			0.0929655
Th		<0.01	<0.01	<0.01	<0.01	0.01	0.03	<0.01	<0.01	<0.01	0.01	0.01	<0.01	0.02		0.05	<0.01	0.01	0.02		0.01	<0.01	0.03		0.0111			0.0202375
U		0.01	<0.01	0.03	<0.01	<0.01	0.01	<0.01	<0.01	<0.01	0.01	0.02	<0.01	<0.01		0.01	<0.01	<0.01	0.02		<0.01	<0.01	<0.01		0.01795			0.0164
Eu/Eu*		0.720897	0.778359	0.766787	0.897269	0.894961	0.767126	0.961755	1.29327	1.0136	0.816866	0.837862	1.10072	1.37171		0.736716	0.910942	0.980608	0.930506		0.833239	0.738417	0.850215
Ti/Ti*		0.652987	0.671999	0.577381	0.562604	0.642691	0.583662	0.620905	0.674921	0.658697	0.583884	0.620656	0.634238	0.682453		0.545967	0.608362	0.579707	0.54867		0.539491	0.528304	0.526692
Sr/Sr*		0.159594	0.198745	0.199768	0.244641	0.297326	0.271782	0.373869	0.341549	0.534151	0.578163	0.50387	0.465866	0.50466		0.181875	0.192034	0.188432	0.193089		0.194374	0.183368	0.159556
Zr/Nd (N)		0.794158	0.708912	0.672408	0.522782	0.474853	0.628183	0.480918	0.547887	0.577301	0.693846	0.573232	0.544717	0.487876		0.647899	0.623413	0.615564	0.590674		0.655232	0.66597	0.759528
Ce/Y (N)		0.280412	0.254531	0.26388	0.25586	0.253956	0.297217	0.224081	0.292748	0.252898	0.254125	0.255758	0.26272	0.210892		0.263445	0.281405	0.272358	0.254891		0.226653	0.241181	0.266714
Eu/Eu*=EuN/√(GdN*SmN); Sr/Sr*=SrN/√(CeN*NdN); Ti/Ti*=TiN/√(GdN*DyN); normalised to C1 chondrite (Anders and Ebihara, 1982)
*Mg/(Mg+Fe) (mol%) in Area D is calculated from the elemental map using the Quack software

## Sheet: Table S2
Table S2. Trace element compositions of plagioclase of sample IODP Hole 1473A, 84R4_118-122
Grain		Area A																			(structural core)			Area B
Location (μm)		68.9655	172.414	275.862	300	379.31	431.034	517.241	680	775.862	862.069	1000	1103.45	1272.41	1341.38	1551.72	1637.93	1706.9	1737.93	768.116	913.043			86	172	258	344	430	516	602	688	774	860
Ca/(Ca+Na) (mol%)		54.8253	58.6457	59.4147	62	65.3609	65.948	66.1484	66.2228	65.0582	65.8259	65.8934	65.5164	63.0734	63.1584	59.9983	57.0731	54.0993	59.6315	61	60			56.5583	57.6256	59.9224	64.8083	68.1549	66.6472	66.9503	65.6073	63.9204	64.6579
(ppm)
Sc		5.874	5.7583	4.1329	5.02915	4.13238	4.30992	4.67762	5.52049	4.74578	5.09492	3.5448	4.06483	4.4702	4.03243	3.71138	5.0128	4.42966	4.21491	4.78227	4.27126			9.12	6.83	6.77	6.47	6.88	5.59	6.5	5.47	6.22	5.29
Ti		639.39	441.49	389.54	317.12	354.39	337.78	368.63	452.52	445.95	390.13	339.67	342.56	380.31	399.7	546	599.37	650.06	657.52	592.85	640.31			446.08	509.34	390.06	288.62	303.35	299.99	325.42	289.54	268.91	301.79
V		2.8302	3.382	3.91809	4.49977	4.93346	5.46258	5.07855	5.904	7.93606	7.182	5.39511	6.00283	6.6847	5.98425	5.32634	5.668	5.53708	3.99358	6.95164	5.13			10.99	4.94	3.48	4.32	5.59	5.18	5.74	4.88	4.04	4.28
Co		0.21449	0.2581	0.256051	0.104995	0.212969	0.250577	0.231972	0.304788	0.555822	0.303854	0.219115	0.358778	0.30076	0.199145	0.243748	0.31304	0.370164	0.319486	0.218866	0.597783			1.01	0.51	0.2	0.25	0.16	0.24	0.3	0.17	0.33	0.38
Ni		0.445	0.7654	0.455392	0.400568	0.0801077	0.373861	0.515492	0.202855	1.02049	0.491077	0.525877	0.493942	0.38522	0.171403	0.572757	0.45032	0.276854	0.270408	0.626708	1.68729			2.32	1.09	0.48	0.37	0.69	0.35	0.74	0.32	0.47	0.43
Rb		0.165985	0.23496	0.213089	0.210872	0.221762	0.174402	0.113599	0.206892	0.223914	0.163692	0.119783	0.154046	0.15141	0.0693538	0.242745	0.20488	0.270702	0.443624	0.0453158	0.202475			0.29	0.15	0.09	0.03	0.12	0.09	0.07	0.09	0.15	0.12
Sr		316.622	303.65	273.768	275.456	288.349	310.976	282.203	315.001	288.066	313.031	274.118	292.161	310.112	297.152	303.361	336.804	343.545	330.803	321.974	321.993			300.03	321.2	285.41	273.75	281.17	281.75	281.22	293.72	291.69	300.63
Y		0.153525	0.15664	0.207075	0.20646	0.273538	0.289667	0.243427	0.205883	0.247692	0.263954	0.297997	0.311074	0.30797	0.293268	0.213655	0.19552	0.218407	0.176102	0.25	0.26			0.53	0.12	0.14	0.24	0.33	0.33	0.32	0.27	0.19	0.18
Zr		0.057405	0.31595	0.380639	0.203813	0.3429	0.0811869	0.160375	0.258363	0.29624	0.312038	0.255148	0.188831	0.2575	0.109975	0.424302	0.15288	0.303514	0.680352	0.189941	0.345172			0.82	0.41	0.01	0.12	0.28	0.32	0.22	0.1	0.08	0.14
Ba		4.95285	4.806	3.95246	3.08808	3.45831	3.26752	2.93067	3.58277	3.15065	4.04115	3.4182	3.29957	4.1406	3.65594	4.6944	4.6072	5.7319	7.40015	3.04677	3.7024			4.8	4.84	3.46	2.99	2.88	2.7	2.84	2.83	2.9	3.11
La		0.44678	0.38715	0.291279	0.258516	0.200269	0.203468	0.257746	0.285612	0.301194	0.309992	0.229828	0.223615	0.27089	0.254628	0.297914	0.3172	0.410154	0.45036	0.306605	0.386631			0.48	0.44	0.32	0.22	0.25	0.32	0.23	0.26	0.17	0.23
Ce		1.5259	1.55661	1.01217	0.910542	0.8223	0.844945	0.875868	0.911335	0.916462	0.908492	0.919311	0.870609	0.87344	0.869895	1.01311	1.2064	1.35761	1.37899	0.9	1.12133			1.47	1.65	1.19	0.84	0.77	0.72	0.68	0.64	0.49	0.62
Pr		0.149075	0.14863	0.149506	0.0882308	0.0641838	0.0604392	0.0677777	0.0999138	0.0697502	0.122769	0.0983585	0.107335	0.09476	0.109975	0.106326	0.15496	0.111767	0.177065	0.086775	0.139804			0.14	0.17	0.14	0.09	0.09	0.06	0.07	0.08	0.04	0.06
Nd		0.75739	0.53667	0.524131	0.442918	0.221762	0.41696	0.363708	0.394609	0.432966	0.343754	0.496662	0.55556	0.35123	0.521145	0.535643	0.69472	0.714693	0.739052	0.514865	0.630565			0.66	0.56	0.43	0.42	0.5	0.28	0.38	0.26	0.35	0.29
Sm		0.016465	0.1068	0.0455392	0.144698	0.103554	0.0671546	0.117418	0.227077	0.110966	0.263954	0.100306	0.10336	0.07107	0.0990769	0.115354	0.08008	0.105615	0.128949	0.107023	0.0674917			0.12	0.11	0.11	0.16	0.1	0.12	0.12	0.04	0.11	0.11
Eu		0.60876	0.61054	0.631535	0.517032	0.5207	0.467075	0.631001	0.647926	0.522135	0.507446	0.616445	0.60724	0.57577	0.720289	0.621908	0.68224	0.726998	0.614915	0.815685	0.511008			0.72	0.61	0.55	0.49	0.47	0.45	0.52	0.61	0.56	0.56
Gd		<0.01	0.03827	0.0395246	0.198519	0.112346	0.101233	0.0420031	0.0706462	0.0416123	0.101285	0.1266	0.0655938	0.08549	0.133754	0.168517	0.07592	0	0.0933438	0.118593	0.17355			0.05	0.08	0.1	0.05	0.09	0.11	0.09	0.07	<0.01	0.07
Tb		0.009345	0.013884	0.0109122	0.00944069	0.0358531	0.00731685	0.00563223	0.00706462	0.0186265	0.00439923	0.00964108	0.0246474	0.021115	0.0191218	0.00852615	0.025896	0.0204052	0.0166479	0.0134019	0.0322996			0.02	0.01	0.02	<0.01	0.01	0.01	0.02	0.01	0.01	0.01
Dy		0.051175	0.03827	0.109982	0.0891131	0.0742462	0.0430992	0.0572769	0.145329	0.0713354	0.0542231	0.0292154	<0.01	<0.01	0.0554831	0.0571754	0.0208	0.0840815	0	0.0443517	0.12727			0.14	0.04	0.02	0.04	0.04	0.11	0.04	0.03	0.02	0.06
Ho		0.002937	<0.01	0.0135758	<0.01	0.0130908	<0.01	0.0118372	0.00353231	0.00227877	0	0.0210351	0.00973969	0.013905	0.00653908	0.0145446	0.005408	<0.01	0.0127987	0.0252612	0.00742408			0.01	0.01	0.01	0.03	0.01	0	0.01	0.02	<0.01	0.01
Er		0.00979	<0.01	0.0154662	0.0202931	<0.01	0.0511177	<0.01	0.0292677	0.0188246	0.0450154	0.0301892	0.0168954	0.11227	<0.01	<0.01	0.03224	<0.01	0.0789092	<0.01	<0.01			0.06	<0.01	0.02	<0.01	<0.01	<0.01	<0.01	<0.01	0.03	0.03
Tm		<0.01	<0.01	0.0282687	<0.01	0.00742462	<0.01	<0.01	<0.01	0.00653908	0.00583154	<0.01	0.00417415	<0.01	<0.01	<0.01	<0.01	0	<0.01	<0.01	<0.01			0.01	<0.01	<0.01	0.01	<0.01	0	0	<0.01	<0.01	<0.01
Yb		<0.01	<0.01	0.0481169	0.0811723	0.0156308	<0.01	<0.01	<0.01	0.0366585	<0.01	<0.01	0.0864646	<0.01	<0.01	0.0561723	0.03952	0.0256346	<0.01	<0.01	0.0385667			<0.01	<0.01	<0.01	0.02	<0.01	0.09	0.07	<0.01	<0.01	<0.01
Lu		<0.01	<0.01	0.006702	<0.01	<0.01	<0.01	<0.01	<0.01	<0.01	<0.01	0.00486923	<0.01	<0.01	<0.01	<0.01	<0.01	0.00851069	<0.01	<0.01	<0.01			0.01	0.01	0	<0.01	<0.01	0.01	<0.01	0.01	<0.01	<0.01
Hf		<0.01	<0.01	0	<0.01	0.0263769	<0.01	<0.01	<0.01	<0.01	<0.01	0	<0.01	0.02472	<0.01	<0.01	<0.01	0.0543454	<0.01	<0.01	0.0482083			0.03	<0.021	0.02	<0.01	<0.01	0.01	<0.01	0.08	<0.01	<0.01
Ta		<0.01	<0.01	0.00489762	<0.01	<0.01	<0.01	0.00811423	0.00353231	<0.01	0.00306923	0	0.00695692	0.005871	<0.01	<0.01	<0.01	0	<0.01	<0.01	<0.01			<0.01	<0.01	<0.01	<0.01	<0.01	0.01	<0.01	<0.01	0	<0.01
Pb		0.41029	0.70399	0.348848	0.488798	0.3683	0.646488	0.290203	0.549022	0.439902	0.459362	0.35448	0.377662	0.45526	0.446837	0.53464	0.58448	0.617282	0.653407	0.221758	0.50908			0.53	0.43	0.29	0.22	0.29	0.19	0.34	0.28	0.24	0.17
Eu/Eu*		-	29.0008	45.2044	9.26391	14.66	17.2028	27.2855	15.5348	23.3339	9.42463	16.6121	22.3956	22.4315	19.001	13.5456	26.571	-	17.0205	21.987	14.3384			28.2271	19.7469	15.9249	16.6365	15.0448	11.8942	15.195	35.0075	-	19.38
Ti/Ti*		-	7.37775	2.88217	1.29444	1.69923	2.69383	3.29318	1.83926	4.12221	3.08399	3.12939	-	-	2.19109	2.04609	7.15812	-	-	3.94817	2.08089			2.67083	4.51041	4.36917	3.23292	2.53265	1.36615	2.71691	3.16506	-	2.33272
Sr/Sr*		19.7249	22.2499	25.1729	29.0495	45.2228	35.0883	33.486	35.1793	30.6271	37.5146	27.169	28.1347	37.4977	29.5572	27.5798	24.6391	23.3579	21.9457	31.6774	25.6456			20.4001	22.3788	26.7214	30.8665	30.3484	42.0258	37.0508	48.223	47.1723	47.4826
Zr/Nd (N)		0.00870275	0.0675986	0.0833874	0.0528366	0.177545	0.0223572	0.0506303	0.0751778	0.0785627	0.104229	0.0589872	0.0390273	0.0841806	0.0242306	0.0909548	0.0252678	0.0487624	0.105702	0.0423596	0.0628538			0.142658	0.0840664	0.00267029	0.0328064	0.0643005	0.131226	0.0664761	0.0441624	0.0262451	0.0554315
Ce/Y (N)		25.7046	25.7004	12.6413	11.4058	7.77455	7.54385	9.30536	11.4478	9.56897	8.90136	7.97836	7.23807	7.33479	7.67125	12.2632	15.9574	16.0758	20.2516	9.31034	11.1538			7.17306	35.5603	21.9828	9.05172	6.03448	5.64263	5.49569	6.13027	6.66969	8.90805
Eu/Eu*=EuN/√(GdN*SmN); Sr/Sr*=SrN/√(CeN*NdN); Ti/Ti*=TiN/√(GdN*DyN); normalised to C1 chondrite (Anders and Ebihara, 1982)
Table S2. (continued)
Grain		Area C															Area D
Location (μm)		127	254	381	508	635	762	889	1016	1143	1270	1397	1524	1651	1778		115	230	345	460	575	690	805	920	1035	1150	1265	1380	1495	1610	1725	1840
Ca/(Ca+Na) (mol%)		50.0914	50.5078	56.1537	66.0804	66.5719	65.3477	62.8426	65.1843	65.2782	54.6568	54.2225	52.1919	53.4519	51.6242		61.9811	65.1186	65.313	65.2703	64.9374	65.2886	66.4046	64.855	64.6918	64.9899	64.1271	64.9374	65.8334	66.1986	58.6801	59.7409
(ppm)
Sc		2.87862	3.40072	3.19646	3.1773	3.00258	3.4424	2.39631	2.68443	3.20018	3.72688	3.1779	3.39545	3.24768	3.60648		3.71	3.68	3.96	2.95	3.88	3.5	4.07	3.86	2.97	3.14	3.33	3.36	3.04	3.29	3.32	3.45
Ti		690.38	798.4	714	521.71	361.05	453.46	324.71	365.75	435.09	678.55	615.22	495.76	454.06	487.42		271.5	356.27	369.46	379.4	368.43	406.98	481.24	400.51	421	322.42	296.46	271.9	282.51	267.24	427.82	439.25
V		1.5708	2.95305	3.17218	3.0349	4.69154	6.73203	5.74115	6.12879	5.71462	4.06746	3.6531	2.67198	2.09217	1.52976		1.91	2.28	2.72	3.03	2.92	2.69	2.96	2.27	2.89	3.54	3.93	3.63	3.79	2.95	2.12	1.41
Co		0.280043	0.406829	0.388431	0.43432	0.246923	0.297391	0.288555	0.181594	0.201751	0.424262	0.58113	0.222826	0.202214	0.208526		0.31	0.07	0.17	0.23	0.13	0.14	0.25	0.15	0.27	0.27	0.1	0.27	0.26	0.17	0.2	0.19
Ni		0.398031	0.565477	0.356062	1.0502	0.879046	1.64991	0.529185	0.312855	0	0.866038	0.5247	0.636646	0.420185	0.418762		0.46	0.23	0.82	0.26	0.7	0.46	0.33	0.51	0.37	0.19	<0.147	0.65	0.27	0.35	0.32	<0.01
Rb		0.162766	0.14294	0.160228	0.04717	0.0562985	0	0.105837	0.0315815	0.153052	0.133312	0.21681	0.122506	0.167198	0.323899		0.08	0.12	0.06	<0.01	0.11	0.09	0.06	0.13	0.1	0.09	0.15	0.11	0.22	0.05	0.05	0.07
Sr		257.547	282.738	286.589	284.533	278.332	291.086	288.356	295.82	295.908	336.733	340.233	335.638	313.431	316.302		283.05	265.48	267.79	270.19	258.97	272.83	288.05	286.41	270.34	274.88	282.34	272.06	263.89	256.58	273.05	283.94
Y		0.162766	0.241642	0.123812	0.18334	0.303222	0.431828	0.430337	0.393782	0.377662	0.346415	0.39303	0.390669	0.448197	0.113664		0.17	0.14	0.18	0.17	0.24	0.17	0.23	0.11	0.11	0.26	0.24	0.22	0.21	0.14	0.18	0.15
Zr		0.0248769	0.146082	0	0.12994	0.0325938	0.0845323	0	0	0.0457169	0.133312	0.3465	0.405138	0.501595	0.150412		0.2	0.03	<0.01	<0.01	0.09	0.04	0.1	0.19	0.15	0.17	0.16	<0.01	0.12	<0.01	0.22	0.08
Ba		4.60578	4.89295	4.84729	3.9427	3.05197	3.13686	3.30491	3.32593	3.31945	5.71196	5.8509	5.70088	5.47991	6.37543		3.16	2.52	2.67	2.77	2.63	2.5	2.68	3.07	3.87	2.9	2.8	2.91	3.15	2.46	3.12	3.29
La		0.469818	0.514427	0.355252	0.34799	0.189637	0.303502	0.127803	0.255613	0.450212	0.616931	0.67716	0.654974	0.765962	0.527298		0.55	0.55	0.48	0.4	0.35	0.51	0.48	0.36	0.33	0.38	0.3	0.26	0.29	0.34	0.57	0.46
Ce		1.30071	1.59433	1.28506	1.14899	1.01041	0.906431	0.751842	0.817172	1.40828	1.94615	2.1483	2.28614	1.96086	1.80324		1.55	1.53	1.44	1.28	1.31	1.35	1.45	1.49	1.33	1.08	1.12	1.07	1	1.15	1.65	1.41
Pr		0.146418	0.17357	0.151326	0.16109	0.108646	0.0998092	0.0529185	0.0809277	0.199763	0.186831	0.23067	0.220897	0.243357	0.135884		0.17	0.26	0.21	0.15	0.14	0.19	0.15	0.16	0.16	0.17	0.11	0.12	0.09	0.1	0.19	0.12
Nd		0.410114	0.435103	0.495249	0.60164	0.747683	0.511268	0.301535	0.753022	0.884523	1.11904	0.8217	0.974262	0.849123	0.5555		0.38	0.56	0.54	0.89	0.77	0.7	1.1	0.48	0.27	0.49	0.67	0.46	0.44	0.56	0.52	0.64
Sm		0.0696554	0.288236	0.0809231	0.12905	0.158031	0.359517	0.255606	0.2566	0.204732	0.263704	0.2178	0.169772	0.335272	0.123065		<0.01	<0.01	0.19	0.12	0.15	<0.01	<0.01	0.09	0.07	0.18	0.11	0.09	0.17	<0.01	0.14	<0.01
Eu		0.489009	0.53092	0.594785	0.70221	0.55212	0.583578	0.653992	0.575376	0.733458	0.810573	0.78408	0.575875	0.685426	0.660618		0.43	0.38	0.46	0.53	0.49	0.54	0.56	0.49	0.49	0.57	0.67	0.51	0.54	0.48	0.46	0.5
Gd		0.111591	0.0746115	0.0436985	0	0.134326	0	0.120814	0.113496	0.124231	0.185858	0	<0.01	0.287126	0.0658054		<0.01	0.14	<0.01	0.08	0.14	0.11	<0.01	<0.01	0.07	0.17	<0.01	0.12	0.08	<0.01	<0.01	0.15
Tb		<0.01	0.0113881	0.0293751	0.013973	0.017976	0.0134437	0.0357449	0.0310881	0.0218646	0.0318196	0.012573	<0.01	<0.01	0.00521315		<0.01	<0.01	<0.01	0.01	0.01	0.03	0.02	0.01	0.02	<0.01	<0.01	0.02	<0.01	<0.01	<0.01	0.01
Dy		<0.01	0.04084	0.0558369	0	0.05136	0.0865692	0.138786	0	0.0626123	0.108012	0.08316	0.0906738	0.0639031	0.0632415		0.03	<0.01	<0.01	0.05	0.06	<0.01	<0.01	0.05	<0.01	0.11	0.04	0.08	0.08	<0.01	<0.01	0.05
Ho		<0.01	<0.01	0.0173175	0.031506	0.0279517	0.0182305	0.009086	0.0144091	0.0256412	0.00846577	0.008514	<0.01	0	0.0164086		0.02	<0.01	<0.01	<0.01	<0.01	<0.01	<0.01	<0.01	<0.01	0.01	<0.01	<0.01	<0.01	<0.01	0.01	<0.01
Er		<0.01	<0.01	<0.01	0.05162	<0.01	0.0753662	0.118817	0.0226992	0.132182	<0.01	0.1089	<0.01	0.105046	0.0145285		<0.01	<0.01	0.06	<0.01	<0.01	<0.01	0.04	<0.01	<0.01	<0.01	0.05	<0.01	<0.01	<0.01	<0.01	0.02
Tm		<0.01	0.0117022	0.00882062	0.013795	<0.01	0.009268	0.00878646	<0.01	<0.01	0.0106065	0.015543	<0.01	<0.01	<0.01		<0.01	<0.01	<0.01	<0.01	<0.01	<0.01	<0.01	<0.01	<0.01	<0.01	<0.01	0.02	<0.01	<0.01	0.01	<0.01
Yb		<0.01	<0.01	<0.01	<0.01	<0.01	<0.01	0.0279569	0.0493462	0.0725508	0.0720077	<0.01	<0.01	<0.01	<0.01		0.02	0.09	0.05	<0.01	<0.01	0.05	<0.01	<0.01	<0.01	0.08	<0.01	<0.01	0.11	0.05	<0.01	<0.01
Lu		<0.01	<0.01	<0.01	<0.01	<0.01	<0.01	<0.01	<0.01	<0.01	<0.01	<0.01	<0.01	0.00752831	<0.01		<0.01	<0.01	<0.01	<0.01	<0.01	<0.01	0.01	<0.01	<0.01	0.01	<0.01	0.01	<0.01	0.02	<0.01	<0.01
Hf		<0.01	0.0698992	<0.01	<0.01	<0.01	<0.01	<0.01	<0.01	<0.01	<0.01	<0.01	<0.01	0.0192585	<0.01		<0.01	0.06	<0.01	0.11	<0.01	<0.01	<0.01	<0.01	0.06	<0.01	0.1	<0.01	<0.01	<0.01	<0.01	<0.01
Ta		<0.01	0.00439815	<0.01	<0.01	<0.01	<0.01	<0.01	<0.01	<0.01	<0.01	<0.01	<0.01	<0.01	<0.01		0.01	<0.01	<0.01	0	0.01	<0.01	<0.01	<0.01	<0.01	0.01	0.01	<0.01	<0.01	<0.01	0.01	<0.01
Pb		0.403717	0.325935	0.356062	0.34265	0.320012	0.396182	0.3894	0.42339	0.337908	0.420369	0.67023	0.356908	0.498094	0.646944		0.92	0.52	0.63	0.69	0.63	0.23	0.26	0.32	0.78	0.25	0.3	0.24	0.28	0.17	0.26	0.18
Eu/Eu*		16.8436	10.9942	30.3739	-	11.5078	-	11.3016	10.2387	13.9662	11.1187	-	-	6.70866	22.2927		-	-	-	16.4267	10.2683	-	-	-	21.2573	9.89519	-	14.9028	14.0616	-	-	-
Ti/Ti*		-	5.69036	5.85949	-	2.1507	-	1.25423	-	2.45605	2.33446	-	-	1.46993	3.23463		-	-	-	3.00504	2.01372	-	-	-	-	1.18109	-	1.39013	1.769	-	-	2.54076
Sr/Sr*		23.6163	22.7351	24.0593	22.9194	21.4463	28.637	40.5596	25.256	17.7564	15.2817	17.1502	15.0619	16.2679	21.1656		24.7003	19.2083	20.3383	16.9538	17.2689	18.7964	15.2751	22.6815	30.2134	25.3064	21.8285	25.9712	26.6437	21.413	19.7422	20.0182
Zr/Nd (N)		0.00696496	0.0385505	0	0.0247989	0.00500547	0.0189846	0	0	0.00593464	0.0136788	0.0484191	0.0477479	0.067828	0.0310904		0.0604328	0.0061512	-	-	0.0134208	0.00656128	0.0104384	0.0454505	0.0637902	0.0398363	0.0274203	-	0.0313152	-	0.0485787	0.0143528
Ce/Y (N)		20.6671	17.0635	26.8425	16.2077	8.61788	5.42859	4.51836	5.36687	9.64383	14.5293	14.1362	15.1341	11.3147	41.0293		23.5801	28.2635	20.6897	19.4726	14.1164	20.5375	16.3043	35.0313	31.2696	10.7427	12.069	12.5784	12.3153	21.2438	23.7069	24.3103
Eu/Eu*=EuN/√(GdN*SmN); Sr/Sr*=SrN/√(CeN*NdN); Ti/Ti*=TiN/√(GdN*DyN); normalised to C1 chondrite (Anders and Ebihara, 1982)
Table S2. (continued)
Grain		Area I			Area X							Area Y							Average Pl 1	Average Pl 2
Location (μm)
Ca/(Ca+Na) (mol%)		56.1	55.8		54.1644	57.6369	57.4148	58.5901	56.9617	54.4227		54.1146	56.263	57.4855	58.7862	56.5306	54.46		64.9031	55.9788
(ppm)
Sc		6.27	4.74		3.95	3.62	3.6	4.14	3.92	2.89		4.18	3.55	3.35	3.29	3.68	3.86		4.22918	4.35057
Ti		510.35	422.12		513.76	540.76	510.17	507.63	562.95	522.25		594.2	630.47	1012.11	582.9	595.8	560.17		362.488	566.351
V		11.51	3.53		1.79	3.16	2.55	2.99	3.46	1.92		3.39	3.37	9.26	3.87	3.66	2.57		4.53632	3.75746
Co		1.47	0.2		0.26	0.2	0.21	1.01	1.04	0.3		0.34	0.35	0.31	0.32	0.47	0.33		0.243926	0.389388
Ni		4.17	1.11		0.26	<0.144	0.24	0.38	0.46	<0.098		0.69	0.6	1.15	0.56	0.24	<0.147		0.489868	0.704346
Rb		0.11	0.09		0.13	0.1	0.18	0.48	0.06	0.07		0.09	0.06	0.17	0.06	0.12	0.18		0.117344	0.165621
Sr		270.44	269.02		332.92	311.2	308.64	325.94	314.12	329.47		330.76	330.2	320.3	310.18	338.37	324.38		284.656	311.036
Y		0.46	0.22		0.18	0.19	0.23	0.19	0.22	0.17		0.26	0.23	0.23	0.34	0.22	0.25		0.246619	0.230785
Zr		0.4	0.1		0.11	0.13	0.23	<0.01	<0.01	0.05		0.04	0.06	0.21	0.04	<0.01	0.18		0.158429	0.206166
Ba		3.05	2.87		4.94	5.4	4.75	5.36	4.84	5.24		4.95	4.92	4.76	4.54	5.66	5.48		3.16524	4.87837
La		0.61	0.55		0.54	0.64	0.45	0.43	0.54	0.73		0.56	0.5	0.49	0.41	0.42	0.47		0.308711	0.494628
Ce		1.46	1.5		1.72	1.37	1.7	1.7	1.63	1.57		1.78	1.49	1.48	1.3	1.56	1.56		1.02199	1.55637
Pr		0.14	0.14		0.11	0.18	0.12	0.14	0.16	0.15		0.15	0.19	0.16	0.14	0.19	0.11		0.115074	0.157162
Nd		0.7	0.59		0.71	0.51	0.85	0.61	0.57	0.49		0.48	0.71	0.54	0.54	0.55	0.55		0.502415	0.635561
Sm		0.26	0.14		0.07	<0.01	0.07	0.15	0.44	0.17		0.07	0.06	<0.01	0.23	0.11	0.33		0.140786	0.148492
Eu		0.43	0.38		0.74	0.61	0.58	0.51	0.64	0.55		0.58	0.58	0.62	0.66	0.81	0.68		0.552643	0.611996
Gd		0.15	0.18		0.06	0.24	<0.01	0.12	0.18	<0.01		<0.01	0.15	0.1	0.1	<0.01	<0.01		0.0978929	0.0891916
Tb		0.02	<0.01		<0.01	0.01	0.04	<0.01	0.04	<0.01		0.01	0.01	0.01	0.02	0.01	0.03		0.0161086	0.0153787
Dy		0.08	0.14		0.01	<0.01	<0.01	0.12	0.14	0.14		0.07	0.04	0.02	0.13	0.1	0.02		0.0551713	0.0663135
Ho		0.02	0.01		0.01	0.01	<0.01	<0.01	<0.01	0.02		<0.01	0.03	<0.01	<0.01	<0.01	<0.01		0.0127158	0.00856665
Er		<0.01	<0.01		0.03	<0.01	0.04	<0.01	0.02	<0.01		0.03	<0.01	<0.01	0.03	0.04	0.07		0.0397732	0.0292867
Tm		0.02	0.01		0.01	<0.01	<0.01	<0.01	0.01	0.03		0.01	<0.01	<0.01	<0.01	0.01	<0.01		0.00390086	0.0076997
Yb		0.11	<0.01		0.05	<0.01	0.05	<0.01	<0.01	<0.01		<0.01	0.02	<0.01	<0.01	<0.01	<0.01		0.0377126	0.0197752
Lu		<0.01	<0.01		<0.01	<0.01	<0.00	<0.01	<0.01	<0.01		0.01	<0.01	<0.01	<0.01	<0.01	<0.01		0.00287959	0.00251148
Hf		0.05	<0.01		<0.01	<0.01	<0.01	<0.01	0.03	0.04		<0.01	0.21	<0.01	<0.01	<0.01	0.08		0.0196439	0.0264068
Ta		<0.01	<0.01		<0.01	<0.01	0.01	0.01	0.01	0.01		<0.01	<0.01	<0.01	0.01	<0.01	0.01		0.00310175	0.00330399
Pb		0.19	0.22		0.8	0.46	0.5	0.85	0.63	1.01		0.65	0.47	0.49	0.45	0.53	0.55		0.396512	0.495043
Eu/Eu*		6.6122	7.26931		34.6751	-	-	11.5437	6.90601	-		-	18.5659	-	13.2157	-	-
Ti/Ti*		2.46768	1.32445		11.0358	-	-	2.00238	1.70286	-		-	4.26534	11.4175	2.6343	-	-
Sr/Sr*		17.9161	19.1518		20.1764	24.934	17.1955	21.4361	21.8254	25.1574		23.9651	21.5007	23.9953	24.7938	24.465	23.4535
Zr/Nd (N)		0.0656128	0.0194614		0.0177894	0.0292684	0.0310696	-	-	0.0117166		0.00956853	0.0097033	0.0446531	0.00850536	-	0.0375782
Ce/Y (N)		8.2084	17.6332		24.7126	18.6479	19.1154	23.1397	19.1614	23.8844		17.7056	16.7541	16.6417	9.88844	18.3386	16.1379
Eu/Eu*=EuN/√(GdN*SmN); Sr/Sr*=SrN/√(CeN*NdN); Ti/Ti*=TiN/√(GdN*DyN); normalised to C1 chondrite (Anders and Ebihara, 1982)

## Sheet: Table S3
Table S3. Parameters and results of the assimialtion-fractional crystallization (AFC) model at constant and decreasing temperature conditions.
Parameters
	Melt	Assimilant		Kd	Plagioclsse		Clinopyroxene
(ppm)				(T dependent)	1180ºC	1030ºC	1180ºC	1030ºC
Ce	8.1	0.704			0.037	0.019	0.15	0.23
Y	18.5	7.057			0.007	0.003	0.54	0.95
Results
AFC at constant temperature
	Ce (Liquid)	Ce (Cpx)	Ce (Pl)		Y (Liquid)	Y (Cpx)	Y (Pl)
T=1180ºC
1	8.0694	1.21692	0.30132		18.5564	10.1262	0.135896
0.9	8.99416	1.35638	0.335852		23.7131	12.9402	0.17366
0.8	10.0615	1.51734	0.375707		29.0519	15.8536	0.212758
0.7	11.3159	1.70651	0.422547		34.6034	18.8831	0.253415
0.6	12.8248	1.93407	0.478893		40.4087	22.051	0.295929
0.5	14.6977	2.2165	0.548826		46.5251	25.3888	0.340722
0.4	17.1269	2.58284	0.639535		53.0382	28.943	0.38842
0.3	20.4965	3.09101	0.765362		60.0857	32.7888	0.440032
0.2	25.7425	3.88213	0.961252		67.923	37.0657	0.497428
0.1	36.2485	5.46651	1.35356		77.1599	42.1062	0.565073
0.01	90.7138	13.6802	3.38735		89.1702	48.6603	0.65303
T=1030ºC
1	8.0694	1.88397	0.156428		18.5564	17.7022	0.062377
0.9	8.88331	2.074	0.172206		21.2822	20.3025	0.0715399
0.8	9.80998	2.29035	0.19017		23.7524	22.659	0.0798433
0.7	10.8824	2.54073	0.210959		25.9634	24.7682	0.0872755
0.6	12.15	2.83667	0.235532		27.9112	26.6263	0.093823
0.5	13.6911	3.19648	0.265408		29.5911	28.2289	0.0994701
0.4	15.6411	3.65175	0.303208		30.9975	29.5706	0.104198
0.3	18.2626	4.26379	0.354027		32.1231	30.6444	0.107981
0.2	22.1737	5.17692	0.429846		32.9585	31.4413	0.110789
0.1	29.4922	6.88559	0.571718		33.4892	31.9476	0.112574
0.01	60.7362	14.1802	1.17739		33.6836	32.1331	0.113227
AFC at decreasing temperature (T=1180º-1030ºC)
	Ce (Liquid)	Ce (Cpx)	Ce (Pl)		Y (Liquid)	Y (Cpx)	Y (Pl)
dT/dF=0.3
1	8.0694	1.23026	0.298422		18.5564	10.2778	0.134426
0.9	8.98973	1.38508	0.329306		23.6158	13.2347	0.169576
0.8	10.0464	1.56372	0.364575		28.7339	16.2619	0.204784
0.7	11.2812	1.77325	0.40562		33.9122	19.3539	0.240123
0.6	12.7574	2.02433	0.454557		39.1589	22.5086	0.275718
0.5	14.5769	2.3341	0.514816		44.4931	25.7296	0.311772
0.4	16.9188	2.73249	0.59245		49.9525	29.0308	0.348629
0.3	20.1391	3.27866	0.699549		55.6117	32.4457	0.386904
0.2	25.1001	4.1152	0.865599		61.6294	36.0533	0.427833
0.1	34.8972	5.75033	1.19719		68.4257	40.0745	0.474573
0.01	84.1187	13.7902	2.90116		76.9632	45.0243	0.534273
dT/dF=0.6
1	8.0694	1.2436	0.295525		18.5564	10.4293	0.132955
0.9	8.98529	1.41379	0.32276		23.5186	13.5292	0.165491
0.8	10.0313	1.6101	0.353443		28.4159	16.6703	0.196809
0.7	11.2465	1.83998	0.388693		33.221	19.8247	0.226832
0.6	12.6899	2.11459	0.430221		37.9092	22.9661	0.255508
0.5	14.4561	2.4517	0.480806		42.461	26.0705	0.282822
0.4	16.7108	2.88214	0.545364		46.8668	29.1187	0.308838
0.3	19.7817	3.4663	0.633735		51.1377	32.1026	0.333776
0.2	24.4577	4.34826	0.769946		55.3358	35.0409	0.358238
0.1	33.546	6.03414	1.04082		59.6916	38.0428	0.384073
0.01	77.5236	13.9002	2.41497		64.7561	41.3883	0.415517
dT/dF=0.9
1	8.0694	1.25694	0.292627		18.5564	10.5808	0.131485
0.9	8.98086	1.44249	0.316214		23.4214	13.8237	0.161406
0.8	10.0162	1.65648	0.342311		28.0979	17.0786	0.188834
0.7	11.2118	1.90672	0.371766		32.5298	20.2955	0.213541
0.6	12.6224	2.20485	0.405885		36.6594	23.4236	0.235297
0.5	14.3353	2.5693	0.446796		40.4289	26.4113	0.253872
0.4	16.5028	3.03178	0.498278		43.7811	29.2066	0.269047
0.3	19.4242	3.65395	0.567921		46.6637	31.7595	0.280648
0.2	23.8153	4.58132	0.674293		49.0422	34.0285	0.288643
0.1	32.1947	6.31796	0.884454		50.9575	36.0111	0.293573
0.01	70.9286	14.0102	1.92878		52.5491	37.7523	0.29676
dT/dF=1.2
1	8.0694	1.27028	0.289729		18.5564	10.7323	0.130014
0.9	8.97642	1.4712	0.309668		23.3241	14.1182	0.157321
0.8	10.0011	1.70286	0.331178		27.78	17.4869	0.180859
0.7	11.1772	1.97346	0.354839		31.8386	20.7663	0.20025
0.6	12.5549	2.29511	0.381549		35.4097	23.8812	0.215087
0.5	14.2145	2.68689	0.412785		38.3968	26.7521	0.224921
0.4	16.2948	3.18143	0.451192		40.6954	29.2944	0.229255
0.3	19.0668	3.84159	0.502108		42.1896	31.4164	0.22752
0.2	23.173	4.81438	0.578639		42.7485	33.0161	0.219048
0.1	30.8435	6.60177	0.728086		42.2234	33.9793	0.203073
0.01	64.3335	14.1202	1.44259		40.342	34.1163	0.178003
dT/dF=1.5
1	8.0694	1.28362	0.286831		18.5564	10.8838	0.128544
0.9	8.97199	1.4999	0.303123		23.2269	14.4127	0.153236
0.8	9.98604	1.74924	0.320046		27.462	17.8952	0.172884
0.7	11.1425	2.0402	0.337912		31.1474	21.2371	0.186959
0.6	12.4874	2.38537	0.357213		34.1599	24.3387	0.194876
0.5	14.0937	2.80449	0.378775		36.3647	27.0929	0.195971
0.4	16.0868	3.33107	0.404107		37.6097	29.3823	0.189464
0.3	18.7094	4.02924	0.436294		37.7156	31.0733	0.174391
0.2	22.5306	5.04745	0.482986		36.4549	32.0037	0.149453
0.1	29.4922	6.88559	0.571718		33.4892	31.9476	0.112574
0.01	57.7385	14.2301	0.956398		28.135	30.4804	0.0592468
Pl and Cpx partitionl coefficients are calculated following Sun and Liang (2014). AFC process following the equation in DePaolo (1981). dT/dF represent the ºC of T drop at each step (1%) of the AFC process
